# Supplementary material for: Foot Strike Patterns Differ Between Children and Adolescents Growing up Barefoot vs. Shod
Source: PubMed Central journal article supplement — Int J Sports Med. 2017 Nov 16;39(2):97–103. doi: 10.1055/s-0043-120344 (PMC6193404; doi:10.1055/s-0043-120344), 2017-11-16
Supplement: 10-1055-s-0043-120344-6382-0001.pdf [file 10-1055-s-0043-120344-6382-0001.pdf]

Supplementary Material

► **Table S1** Descriptive statistics of all habitually barefoot and habitually shod children included in the analysis by age.

| Age   | Frequencies         |                 | Percentage male | Height            |                     |                   | Weight           |                     |                  | BMI             |                     |                 | PAQ score      |                     |                 |
|-------|---------------------|-----------------|-----------------|-------------------|---------------------|-------------------|------------------|---------------------|------------------|-----------------|---------------------|-----------------|----------------|---------------------|-----------------|
|       | Habitually barefoot | Habitually shod |                 | Total             | Habitually barefoot | Habitually shod   | Total            | Habitually barefoot | Habitually shod  | Total           | Habitually barefoot | Habitually shod | Total          | Habitually barefoot | Habitually shod |
| 6     | 7                   | 8               | 15              | 120.99<br>(2.81)  | 123.81<br>(4.98)    | 122.49<br>(4.23)  | 23.13<br>(2.09)  | 24.98<br>(4.32)     | 24.11<br>(3.48)  | 15.77<br>(0.9)  | 16.17<br>(1.62)     | 15.99<br>(1.3)  | 3.15<br>(0.33) | 3.1<br>(0.64)       | 3.13<br>(0.5)   |
| 7     | 6                   | 32              | 38              | 126.23<br>(5.93)  | 130.03<br>(6.6)     | 129.43<br>(6.57)  | 26.23<br>(3.71)  | 27.97<br>(4.79)     | 27.69<br>(4.63)  | 16.39<br>(1.27) | 16.46<br>(1.89)     | 16.45<br>(1.79) | 2.93<br>(0.47) | 2.73<br>(0.8)       | 2.76<br>(0.76)  |
| 8     | 29                  | 24              | 53              | 131.34<br>(4.66)  | 131.78<br>(5.88)    | 131.54<br>(5.2)   | 29.94<br>(3.93)  | 28.61<br>(5.18)     | 29.34<br>(4.54)  | 17.33<br>(1.92) | 16.4<br>(2.23)      | 16.91<br>(2.1)  | 3.14<br>(0.75) | 2.92<br>(0.61)      | 3.04<br>(0.69)  |
| 9     | 27                  | 19              | 46              | 139.41<br>(5.52)  | 138.3<br>(6.65)     | 138.95<br>(5.97)  | 34.95<br>(6.96)  | 31.16<br>(4.45)     | 33.39<br>(6.28)  | 17.89<br>(2.78) | 16.26<br>(1.66)     | 17.22<br>(2.5)  | 3.28<br>(0.62) | 2.96<br>(0.64)      | 3.15<br>(0.64)  |
| 10    | 21                  | 22              | 43              | 144.19<br>(5.73)  | 143.74<br>(5.01)    | 143.96<br>(5.31)  | 38.3<br>(8.56)   | 36.92<br>(8.5)      | 37.59<br>(8.46)  | 18.34<br>(3.54) | 17.75<br>(3.25)     | 18.04<br>(3.37) | 3.34<br>(0.62) | 2.98<br>(0.46)      | 3.15<br>(0.57)  |
| 11    | 31                  | 37              | 68              | 151.62<br>(7.25)  | 150.88<br>(7.02)    | 151.22<br>(7.08)  | 44.82<br>(9.49)  | 44.5<br>(11.2)      | 44.64<br>(10.38) | 19.38<br>(3.22) | 19.42<br>(3.99)     | 19.4<br>(3.64)  | 3.07<br>(0.61) | 2.94<br>(0.79)      | 3<br>(0.71)     |
| 12    | 33                  | 41              | 74              | 157.12<br>(6.59)  | 155.21<br>(6.48)    | 156.06<br>(6.55)  | 52.29<br>(12.59) | 45.19<br>(7.82)     | 48.36<br>(10.75) | 21.07<br>(4.36) | 18.71<br>(2.78)     | 19.76<br>(3.74) | 3.31<br>(0.62) | 2.77<br>(0.67)      | 3.01<br>(0.7)   |
| 13    | 43                  | 45              | 88              | 161.83<br>(8.21)  | 164.09<br>(8.68)    | 162.99<br>(8.48)  | 54.68<br>(13.08) | 53.54<br>(12.89)    | 54.1<br>(12.92)  | 20.69<br>(3.62) | 19.74<br>(3.57)     | 20.2<br>(3.6)   | 3.12<br>(0.63) | 2.72<br>(0.64)      | 2.91<br>(0.66)  |
| 14    | 17                  | 27              | 44              | 170.98<br>(12.39) | 169.15<br>(8.38)    | 169.86<br>(10.02) | 62.46<br>(13.5)  | 56.93<br>(9.99)     | 59.07<br>(11.64) | 21.14<br>(2.64) | 19.85<br>(2.93)     | 20.35<br>(2.86) | 2.96<br>(0.64) | 2.63<br>(0.55)      | 2.76<br>(0.6)   |
| 15    | 27                  | 48              | 75              | 173.62<br>(7.51)  | 172.03<br>(8.93)    | 172.6<br>(8.43)   | 61.91<br>(7.84)  | 63.4<br>(15.19)     | 62.87<br>(12.99) | 20.52<br>(2.2)  | 21.29<br>(4.11)     | 21.01<br>(3.55) | 3.03<br>(0.6)  | 2.5<br>(0.57)       | 2.69<br>(0.63)  |
| 16    | 20                  | 36              | 56              | 168.11<br>(10.26) | 170.04<br>(9.88)    | 169.35<br>(9.97)  | 62.55<br>(10.66) | 59.25<br>(8.78)     | 60.43<br>(9.53)  | 22.09<br>(2.91) | 20.47<br>(2.36)     | 21.05<br>(2.66) | 2.57<br>(0.56) | 2.56<br>(0.65)      | 2.57<br>(0.61)  |
| 17    | 20                  | 30              | 50              | 171.19<br>(10.86) | 173.56<br>(10.48)   | 172.62<br>(10.59) | 71.59<br>(16.01) | 67.67<br>(17.52)    | 69.24<br>(16.88) | 24.2<br>(3.84)  | 22.36<br>(4.76)     | 23.1<br>(4.47)  | 2.85<br>(0.61) | 2.86<br>(0.54)      | 2.86<br>(0.56)  |
| 18    | 7                   | 21              | 28              | 176.71<br>(11.71) | 169.47<br>(8.78)    | 171.28<br>(9.89)  | 83.79<br>(19.67) | 65.31<br>(15.41)    | 69.93<br>(18.12) | 26.61<br>(5.04) | 22.6<br>(4.02)      | 23.6<br>(4.55)  | 2.85<br>(0.55) | 2.67<br>(0.6)       | 2.72<br>(0.59)  |
| Total | 288                 | 390             | 678             | 155.09<br>(17.06) | 156.79<br>(17.43)   | 156.07<br>(17.28) | 50.02<br>(17.71) | 49.25<br>(17.5)     | 49.58<br>(17.58) | 20.11<br>(3.87) | 19.39<br>(3.83)     | 19.7<br>(3.86)  | 3.08<br>(0.64) | 2.75<br>(0.65)      | 2.89<br>(0.67)  |
